# Supplementary material for: Microbiota-driven gut vascular barrier disruption is a prerequisite for non-alcoholic steatohepatitis development
Source: PubMed Central journal article supplement — J Hepatol. 2019 Dec;71(6):1216–28. doi: 10.1016/j.jhep.2019.08.005 (PMC6880766; doi:10.1016/j.jhep.2019.08.005), 2019-12

## Journal of Hepatology

### CTAT methods

Tables for a “Complete, Transparent, Accurate and Timely account” (CTAT) are now mandatory for all revised submissions. The aim is to enhance the reproducibility of methods.

- Only include the parts relevant to your study
- Refer to the CTAT in the main text as ‘Supplementary CTAT Table’
- Do not add subheadings
- Add as many rows as needed to include all information
- Only include one item per row

**If the CTAT form is not relevant to your study, please outline the reasons why:**

|  |
|--|
|  |
|--|

#### 1.1 Antibodies

| Name           | Citation | Supplier      | Cat no. | Clone no.    |
|----------------|----------|---------------|---------|--------------|
| Anti-PV1       |          | BD Pharmingen |         | MECA32       |
| Anti-ZO-1      |          | Invitrogen    |         | ZO-1-1A12    |
| Anti-CD34      |          | eBioscience   |         | RAM34        |
| Anti-occludin  |          | Invitrogen    |         | OC-3F10      |
| Anti-claudin-3 |          | Invitrogen    |         | clone Z23.JM |
| Anti-claudin-5 |          | Invitrogen    |         | clone Z43.JK |
| Anti-CD45.2    |          | BD Pharmingen |         | 104          |
| Anti-CD11b     |          | BD Pharmingen |         | MI70         |
| Anti-CD11c     |          | Biologend     |         | N418         |
| Anti-Ly6C      |          | BD Pharmingen |         | AL21         |
| Anti-Ly6G      |          | Biologend     |         | 1A8          |
| Anti-F4/80     |          | eBioscience   |         | BM8          |
| Anti-CD3       |          | BD Pharmingen |         | 145-2C11     |
| Anti-CD4       |          | BD Pharmingen |         | RAM45        |
| Anti-CD8       |          | BD Pharmingen |         | 53-6.7       |

#### 1.2 Cell lines

#### 1.3 Organisms

#### 1.4 Sequence based reagents

| Name                     | Sequence                        | Ref Seq   |
|--------------------------|---------------------------------|-----------|
| <b>FISH probe</b> Eub338 | 5'- GCT GCC TCC CGT AGG AGT -3' |           |
| <b>qPCR probes</b>       |                                 |           |
| Rpl32                    | FW AAGCGAAACTGGCGGAAAC          | NM_172086 |
|                          | REV TAACCGATGTTGGGCATCAG        |           |
| Lef1                     | FW AACACCTCAGGTCAAACAGGA        | NM_010703 |
|                          | REV TGCTCCTTTCTCTGTTTCGTG       |           |

|              |     |                      |                |
|--------------|-----|----------------------|----------------|
| Cldn5        | FW  | AAATTCTGGGTCTGGTGCTG | NM_013805      |
|              | REV | GTCACGATGTTGTGGTCCAG |                |
| Zo1 (Tjp1)   | FW  | CGCGGAGAGAGACAAGATGT | NM_009386      |
|              | REV | CCTGTGAAGCGTCACTGTGT |                |
| Ccdn1        | FW  | AGTGCGTGCAGAAGGAGATT | NM_007631      |
|              | REV | CTCTTCGCACTTCTGCTCCT |                |
| IFN $\gamma$ | FW  | GCGTCATTGAATCACACCTG | NM_008337.4    |
|              | REV | CTGGACCTGTGGGTTGTTG  |                |
| IL33         | FW  | CCCGCCTTGCAAAATAAGA  | NM_001164724.2 |
|              | REV | CTTATGGTGAGGCCAGAACG |                |
| CCL2         | FW  | AGGTCCCTGTCATGCTTCTG | NM_011333.3    |
|              | REV | TCATTGGGATCATCTTGCTG |                |

## 1.5 Biological samples

| Description | Source | Identifier |
|-------------|--------|------------|
|             |        |            |

## 1.6 Deposited data

| Name of repository | Identifier | Link |
|--------------------|------------|------|
|                    |            |      |

## 1.7 Software

| Software name    | Manufacturer | Version |
|------------------|--------------|---------|
| LasX             | Leica        | SP8     |
| FACSDiva         | BD           |         |
| CellVizio Viewer | CellVizio    |         |
| ImageJ 1.0       | OpenSource   | 1.0     |
| FlowJo 9.7.4     | Treestar     | 9.7.4   |
| Prism 5.0        | Graphpad     | 5.0     |
|                  |              |         |

## 1.8 Other (e.g. drugs, proteins, vectors etc.)

|  |  |  |
|--|--|--|
|  |  |  |
|  |  |  |

## 1.9 Please provide the details of the corresponding methods author for the manuscript:

maria.rescigno@hunimed.eu

## 2.0 Please confirm for randomised controlled trials all versions of the clinical protocol are included in the submission. These will be published online as supplementary information.

# JOURNAL OF HEPATOLOGY

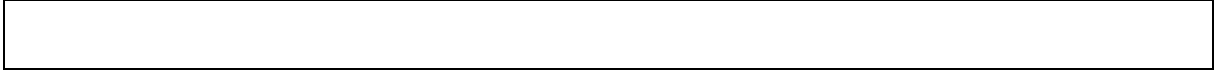

Supplement: CTAT_table.pdf [file CTAT_table.pdf]
