# Supplementary material for: Microbiota-driven gut vascular barrier disruption is a prerequisite for non-alcoholic steatohepatitis development
Source: PubMed Central journal article supplement — J Hepatol. 2019 Dec;71(6):1216–28. doi: 10.1016/j.jhep.2019.08.005 (PMC6880766; doi:10.1016/j.jhep.2019.08.005), 2019-12
Supplement: mmc1.pdf [file mmc1.pdf]

# **Microbiota-driven gut vascular barrier disruption is a prerequisite for non-alcoholic steatohepatitis development**

Juliette Mouries, Paola Brescia, Alessandra Silvestri, Ilaria Spadoni, Marcel Sorribas, Reiner Wiest, Erika Mileti, Marianna Galbiati, Pietro Invernizzi, Luciano Adorini, Giuseppe Penna, Maria Rescigno

## Table of contents

|                            |    |
|----------------------------|----|
| Supplementary methods..... | 2  |
| Fig. S1.....               | 4  |
| Fig. S2.....               | 5  |
| Fig. S3.....               | 6  |
| Fig. S4.....               | 7  |
| Fig. S5.....               | 8  |
| Fig. S6.....               | 9  |
| Fig. S7.....               | 10 |
| Fig. S8.....               | 11 |
| Table S1.....              | 12 |
| Table S2.....              | 12 |

## **Supplementary methods**

### *Special diet and treatments*

Methionine choline deficient diet (MCDD, TD.90262) was used in parallel with CHOW diet in Fig S7. LPS was administered once via oral gavage at two different doses ( $1 \text{ mg.kg}^{-1}$  or  $3 \text{ mg.kg}^{-1}$ ) as indicated in Fig S2.

### *Lung endothelial cells isolation and stimulation*

Mouse lungs were removed from the thoracic cavity and placed in HBSS. Organs were digested with collagenase A ( $1,5 \text{ mg.mL}^{-1}$ ; Roche Diagnostic) and DNase I ( $8 \text{ U.mL}^{-1}$ ; Roche Diagnostic) for 75 min at  $37^{\circ}\text{C}$ .  $\text{CD45}^{-}\text{CD31}^{+}$  endothelial cells were purified using specific MACS beads (Miltenyi Biotec). After selection, lung endothelial cells were cultured on 0.1% gelatin-coated plates in DMEM containing 20% FBS,  $100 \text{ }\mu\text{g.mL}^{-1}$  heparin (Sigma-Aldrich) and  $5 \text{ }\mu\text{g.mL}^{-1}$  endothelial cell growth supplement (Sigma-Aldrich). Confluent lung endothelial cells were treated with  $10 \text{ }\mu\text{M}$  OCA for 4h. Cells were then washed and lysed for the subsequent RNA analysis.

### *RNA extraction and Real Time-PCR*

Isolated endothelial cells were homogenized in  $500 \text{ }\mu\text{L}$  of TRIzol (Invitrogen). RNA was extracted adding  $100 \text{ }\mu\text{L}$  of chloroform, precipitating the aqueous phase with 1 volume of 100% ethanol, and purified using Quick-RNA MiniPrep Kit (Zymo Research) following manufacturer's instructions. Reverse transcription of  $1 \text{ }\mu\text{g}$  of RNA was done using ImProm-II Reverse Transcriptase kit (Promega) with random

primers (Invitrogen). Real Time-PCR assay was performed with Fast Sybr Green Master Mix (Life Technologies). Primers used are listed in CTAT table. Expression levels were normalized to the 60S ribosomal protein gene expression Rpl32. Results were quantified using the  $2^{-\Delta Ct}$  method.

Fig S1 : Tight junction proteins expression in the intestine of 1 week HFD fed male mice

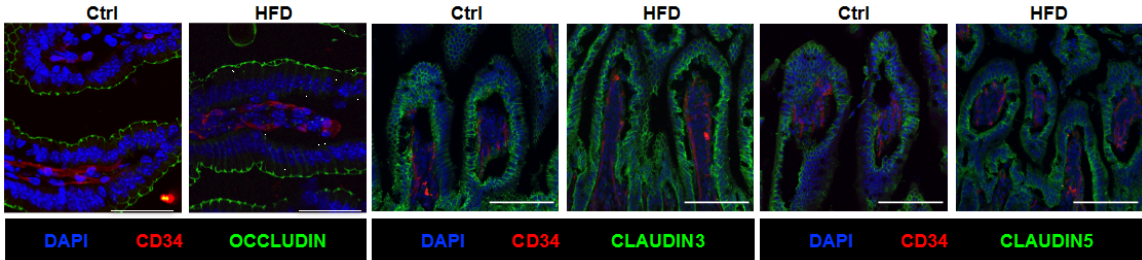

*Fig. S1.* Male mice were fed with Ctrl diet or HFD for 1 week, before ileum sections were stained for CD34 (red), DAPI (blue), and Occludin, Claudin-3 or Claudin-5 expression (green), as indicated.

**Fig S2 : LPS exposure induces disruption of IEB and subsequent damage of GVB**

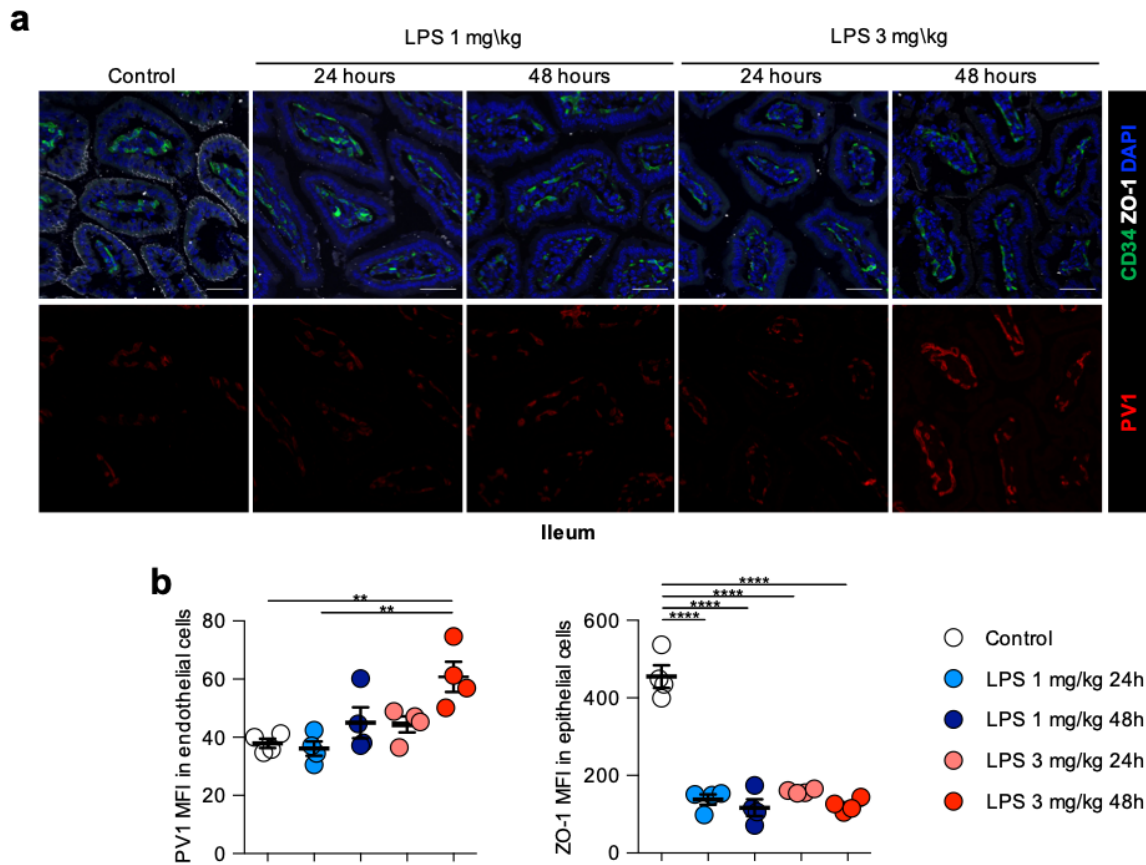

**Fig. S2.** LPS was administered via oral gavage at two different doses (1 mg/kg and 3 mg/Kg) and intestines harvested 24 and 48 hours later. (a) Sections from ileum were stained for CD34 (green), PV1 (red), ZO-1 (white) and DAPI (blue), as indicated. Scale bar indicates 50  $\mu$ m. (b) Quantification of PV1 and ZO-1 MFI was performed on CD34+ and CD34- areas respectively.

\*\* ,  $p < 0.005$ ; \*\*\*\* ,  $p < 0.0001$  unpaired two-tailed t-test.

Fig S3 : 1 week HFD fed male mice

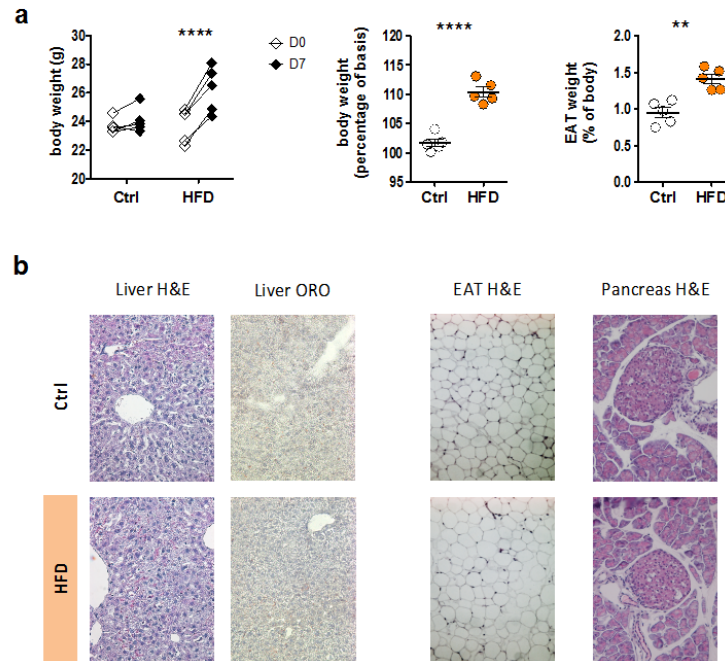

*Fig. S3.* Body and epididymal adipose tissue (EAT) weight was assessed in male mice were fed with Ctrl diet or HFD for 1 week (a). Liver, EAT and pancreas FFPE sections were stained with hematoxylin eosin (b). Liver OCT sections were stained with Oil Red O (ORO) staining (b).

\*\* ,  $p < 0.005$ ; \*\*\*\*,  $p < 0.0001$  unpaired two-tailed t-test.

Fig S4 : 6 weeks HFD fed female mice

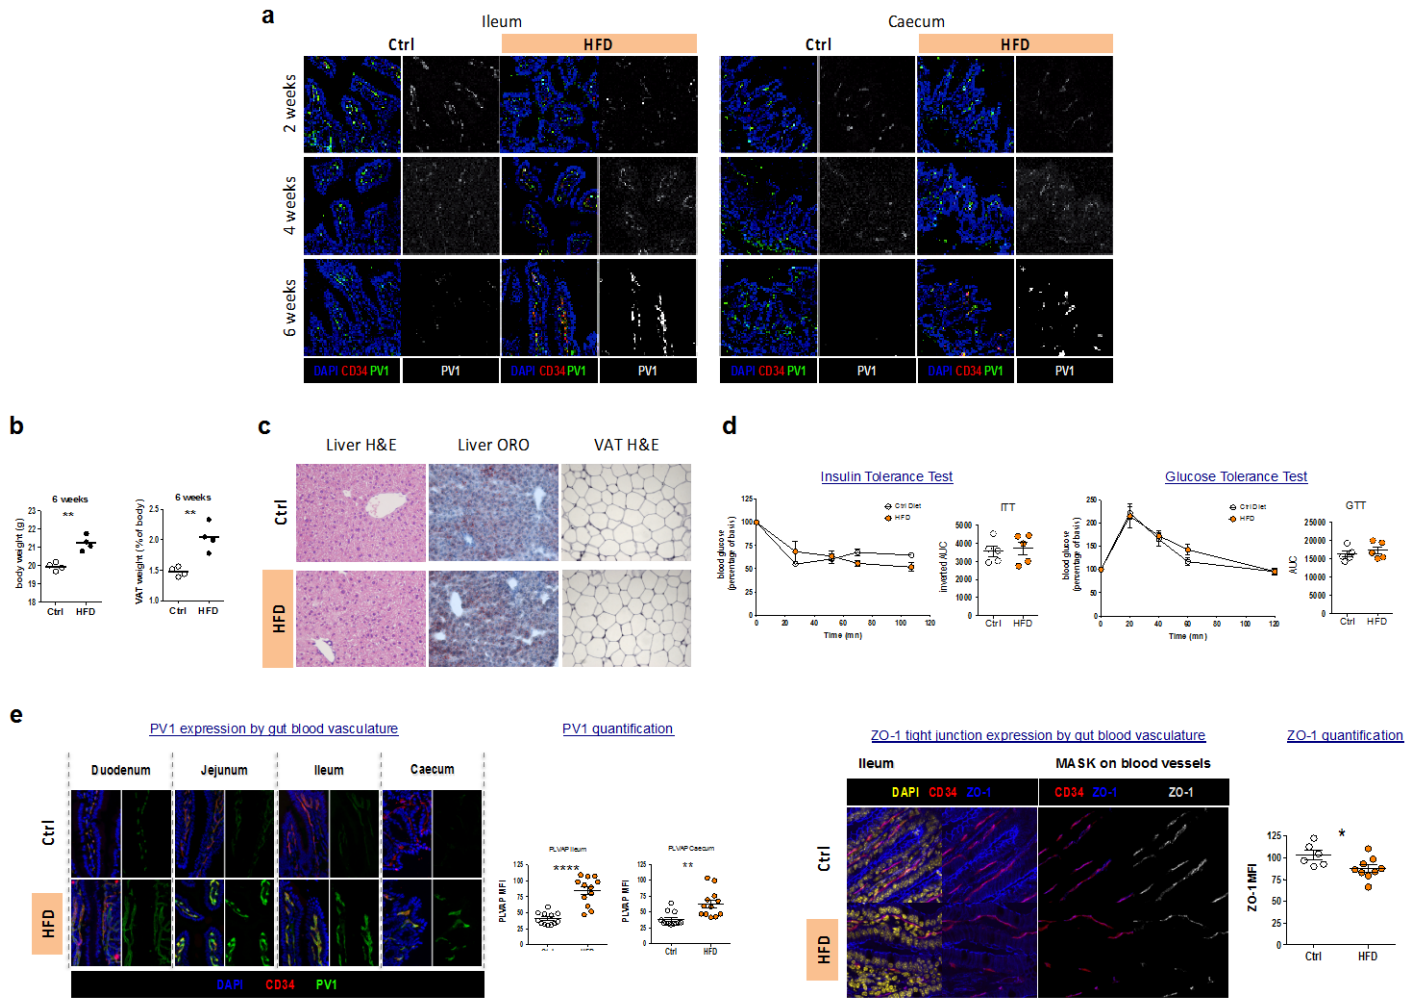

Fig. S4. Female mice were fed with Ctrl diet or HFD for 2, 4 and 6 weeks to assess the changes in the GVB. Sections from ileum and caecum were stained for CD34 (red), PV1 (green) and DAPI (blue), as indicated (a). Female mice were then fed with Ctrl diet or HFD for 6 weeks, before assessing body and visceral adipose tissue (VAT) weight (b). Liver and VAT FFPE sections were stained with hematoxylin eosin (c). Liver OCT sections were stained with ORO staining (c). ITT and GTT were performed as described in supplementary methods (d).

Intestinal sections were stained for CD34, DAPI, and PV1 (left panels) or ZO-1 (right panels) expression, as indicated. Quantification of PV1 and ZO-1 was performed on CD34+ areas (e).

\*,  $p < 0.05$ ; \*\*,  $p < 0.005$ ; \*\*\*\*,  $p < 0.0001$  unpaired two-tailed t-test.

Fig. S5 : HFD fed male GOF mice

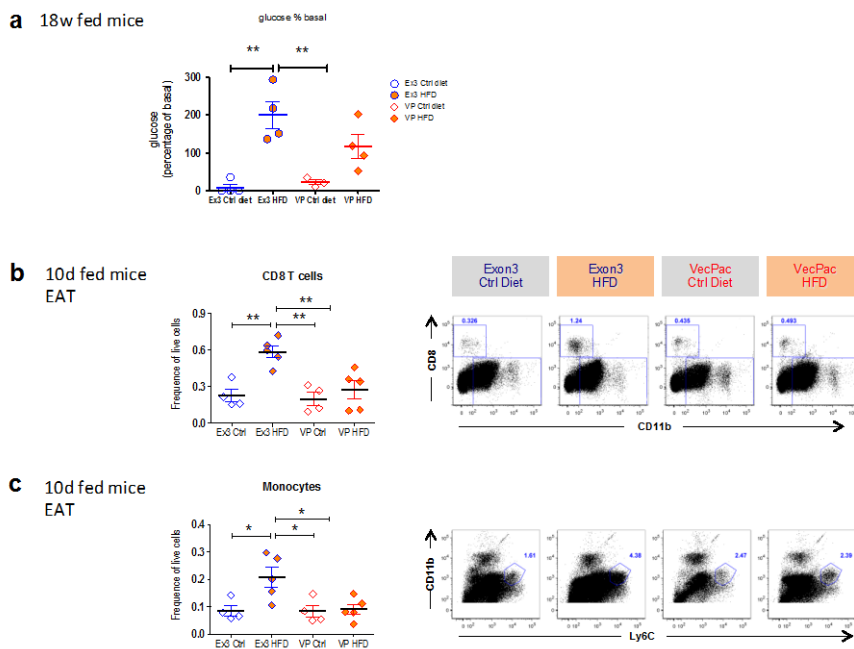

Fig. S5. Male mice of the indicated genotype were fed Ctrl or HFD for 18 weeks before measuring blood glucose levels (a).

Male mice of the indicated genotype were fed Ctrl or HFD for 10 days before harvesting EAT. EAT tissue was digested in Collagenase D, as described in supplementary methods, to obtain cell suspensions. After surface staining, cells were analyzed by FACS, then CD8 T cells (b) and monocytes (c) were gated as shown in the plots.



Fig S6 : ZO-1 expression in endothelial CD34+ cells is increased upon OCA treatment in HFD fed mice

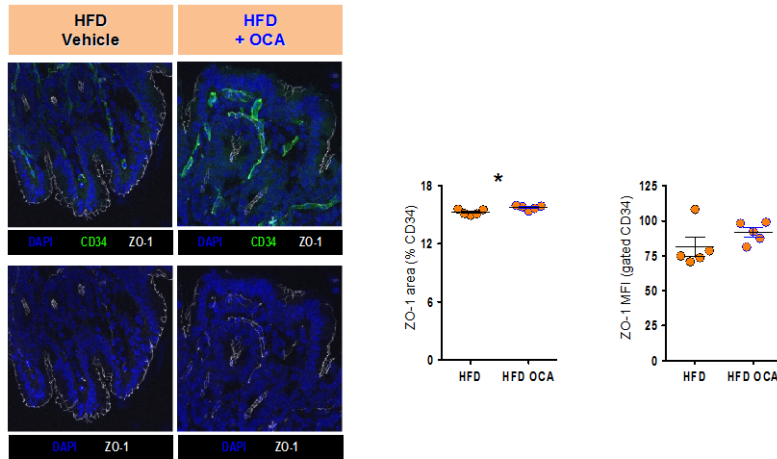

Fig. S6. Mice were fed with Ctrl diet or HFD supplemented or not with OCA for 1 week. Caecum sections were analyzed for ZO-1 expression (white), CD34 (green), DAPI (blue). Quantification of ZO-1 Mean Fluorescence Intensity (MFI) was performed on CD34<sup>+</sup> area.

Fig S7 : OCA protects from GVB disruption in the methionine-choline deficient diet (MCDD) model

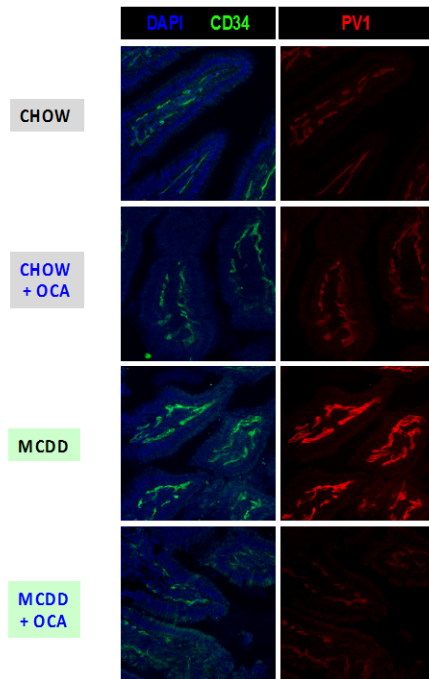

*Fig. S7.* Male mice were fed with CHOW diet or MCDD, with or without OCA oral administration ( $30 \text{ mg.kg}^{-1}$ ) for 1 week, before harvesting intestine. Ileum sections were stained for CD34, DAPI, and PV1 expression, as indicated.

Fig S8 : OCA drives  $\beta$ -catenin activation

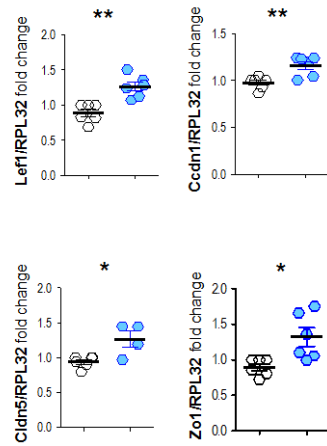

*Fig. S8.* Lung endothelial cells were isolated as described in Materials and Methods. They were then stimulated with 10  $\mu$ M of OCA and gene expression was measured by RT-PCR. \*\*,  $p < 0.005$ ; unpaired two-tailed t-test.

**Table S1.** qPCR primers

| Gene         | Forward primer (5'→3') | Reverse primer (5'→3')     |
|--------------|------------------------|----------------------------|
| Rpl32        | AAGCGAAACTGGCGGAAAC    | TAACCGATGTTGGGCATCAG       |
| Lef1         | AACACCTCAGGTCAAACAGGA  | TGCTCCTTTCTCTGTTTCGTG      |
| Cldn5        | AAATTCTGGGTCTGGTGCTG   | GTCACGATGTTGTGGTCCAG       |
| Zo1          | CGCGGAGAGAGACAAGATGT   | CCTGTGAAGCGTCAGTGTGT       |
| Ccdn1        | AGTGCGTGCAGAAGGAGATT   | CTCTTCGCACTTCTGCTCCT       |
| IFN $\gamma$ | GCGTCATTGAATCACACCTG   | CTGGACCTGTGGGTTGTTG        |
| IL33         | CCCGCCTTGCAAATAAGA     | CTTATGGTGAGGCCAGAACG       |
| CCL2         | AGGTCCCTGTCATGCTTCTG   | TCATTGGGATCATCTTGCTG       |
| PPIA         | Quantitect             | Catalog number: QT00248709 |

**Table S2.** Antibodies for immunofluorescence staining

| Name           | Clone        | Cat. number |
|----------------|--------------|-------------|
| Anti-occludin  | OC-3F10      | Invitrogen  |
| Anti-claudin-3 | clone Z23.JM | Invitrogen  |
| Anti-claudin-5 | clone Z43.JK | Invitrogen  |
